# Supplementary material for: Autophagy is required for lung development and morphogenesis
Source: JCI journal article supplement (doi:10.1172/jci127307), 2019-06-03
Supplement: sd1 [file 1]

# Supplementary Figure 1

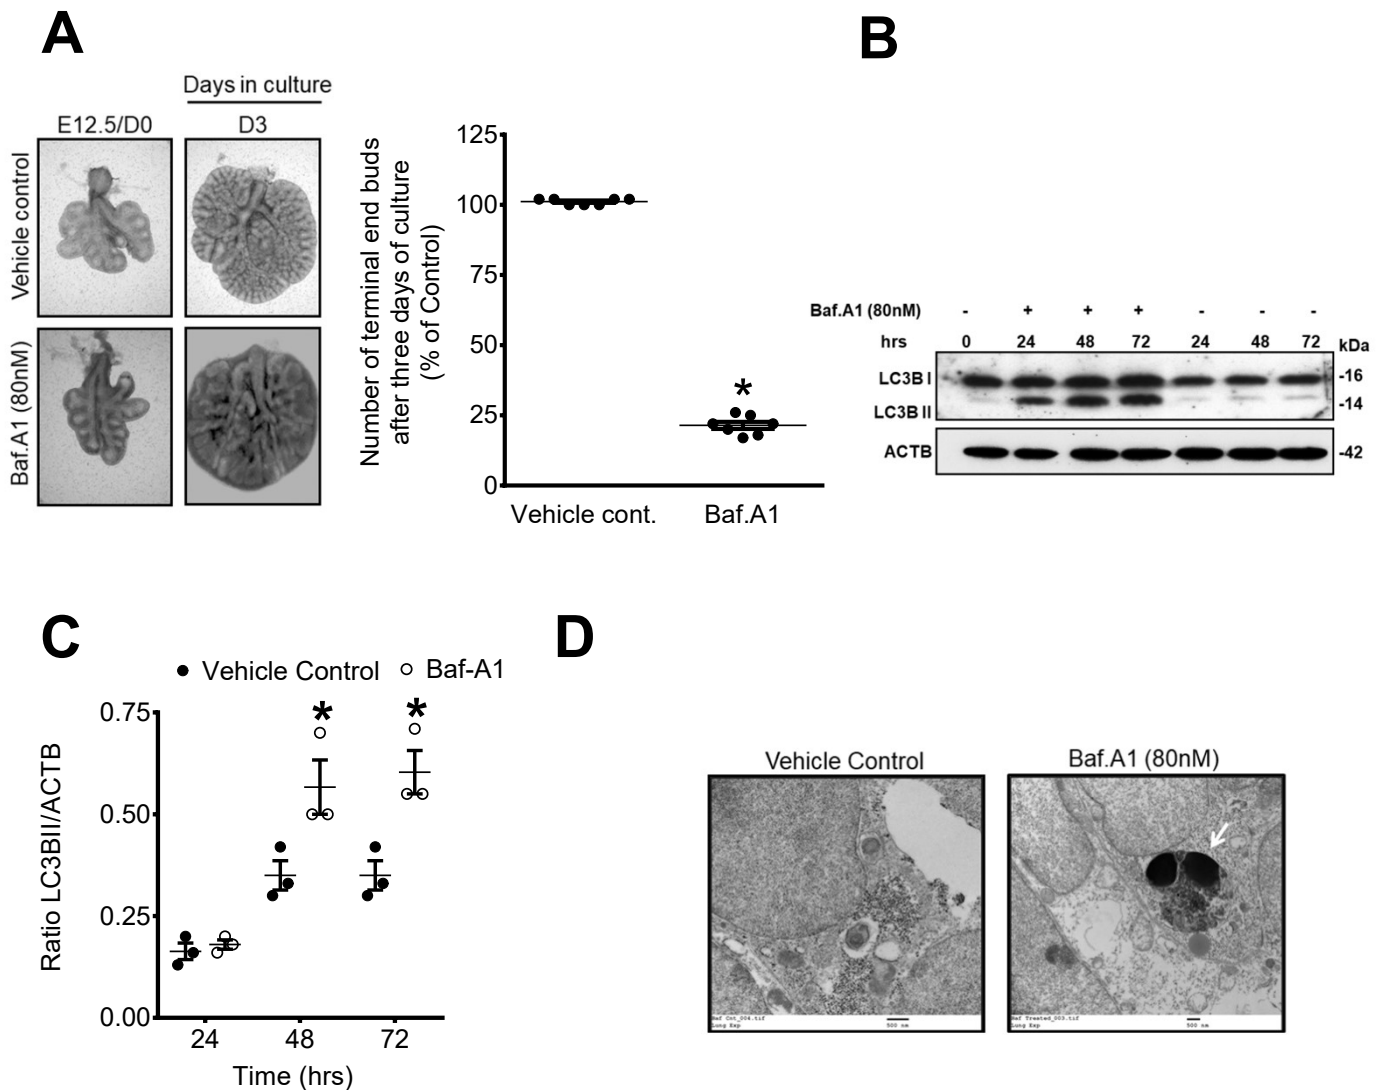

**Supplemental Figure 1: Autophagy flux inhibition reduces early lung branching *in vitro*.** (A-left panel) Representative lung explant micrographs cultured in the presence of autophagy flux inhibitor bafilomycin A<sub>1</sub> (Baf A<sub>1</sub> inhibits autophagosome-lysosome formation. E12.5 lung explants (D0) were treated with 80 nM Baf A<sub>1</sub> or vehicle control and terminal buds were counted after 72 hours of culture (D3) for quantitative evaluation of early branching morphogenesis (A-right panel). The number of terminal end buds at D3 is expressed as percentage of vehicle control (mean ± SEM, n=7 separate lung explant isolations, \*P<0.05 vs. wt control using student-t-test). (B) Representative immunoblot for LC3B-II in lysates of lung explants treated with and without 80 nM Baf A<sub>1</sub> for 72 h. (C) Densitometric analysis of LC3B-II in lysates of lung explants. Actin (ACTB) was used as protein loading control. Data are expressed as mean ± SEM, n=3 separate lung explant isolations, \*P<0.05 vs. vehicle control using one-way ANOVA followed by Tukey post hoc test. (D) Representative TEM images showing accumulation of undigested cargo in autophagolysosomes in Baf A<sub>1</sub> treated explants compared to vehicle-treated explants. Scale bar: 500 nm.

# Supplementary Figure 2

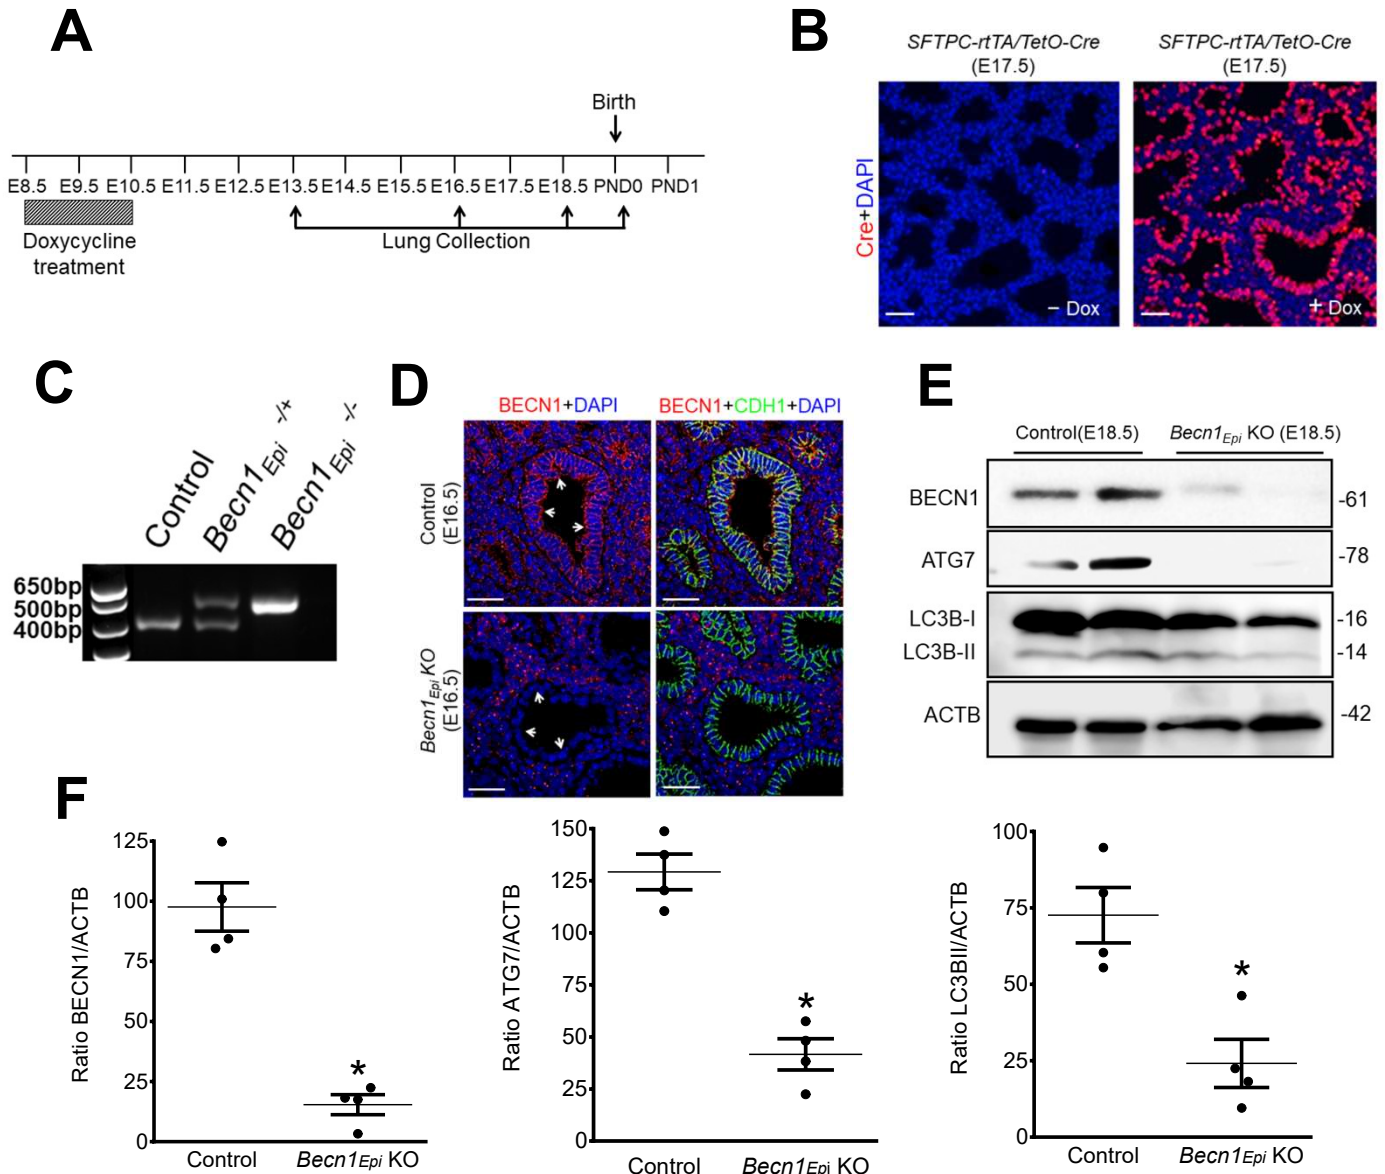

**Supplemental Figure 2: Conditional deletion of *Becn1* in mouse lung epithelial cells during fetal lung development.** (A) Experimental protocol for doxycycline treatment and lung sample collection. (B) Representative IF for Cre recombinase in lung tissue sections from E17.5 embryos of *SFTPC-rtTA/TetO-Cre* transgenic mice. Inducible Cre expression in offspring was achieved by feeding doxycycline to the pregnant mice. Scale bar: 20  $\mu$ m. (C) PCR analysis of genomic DNA extracted from *SFTPC-rtTA/TetO-Cre/Becn1*<sup>fllox/fllox</sup> and wild-type littermate lungs using specific transgene primers. (D) Representative confocal IF microscopy of E16.5 embryos of lung epithelial specific *Becn1* KO (E10.5-*Becn1*<sup>Epi</sup> KO) and littermate control mice for *Becn1* (red) and CDH1 (green), demonstrate lack of expression of *Becn1* in airway epithelial cells in *Becn1*<sup>Epi</sup> KO lungs. White arrowheads point to airway epithelial cells identified by CDH1 expression. Nuclei were visualized with DAPI (blue). Scale bar: 20  $\mu$ m. (E) Representative Western blots for BECN1, ATG7, LC3B in total lung protein extracts of E18.5 littermate control) and *Becn1*<sup>Epi</sup> KO mice. Two independent lung samples from both groups are shown. (F) Densitometric analysis of BECN1, AtG7 and LC3BII proteins. Actin (ACTB) was used as protein loading control. Data represent mean  $\pm$  SEM, n=4 independent experiments, \*P<0.05 vs. matched wt controls using student-t-test.

## Supplementary Figure 3

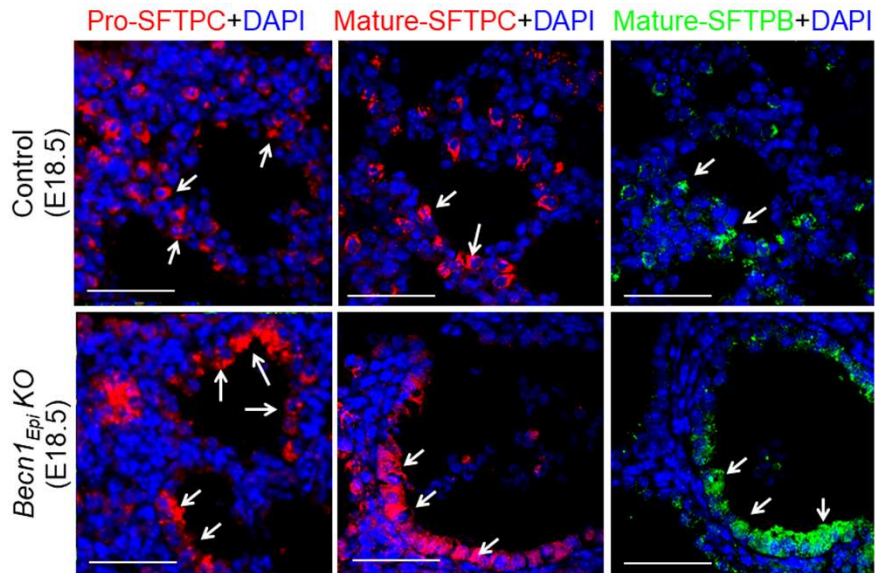

**Supplementary Figure 3: Effect of conditional deletion of lung epithelial *Becn1* on distal epithelial differentiation.** Representative confocal IF microscopy of E18.5 lung tissue sections from E10.5-*Becn1*<sub>Epi</sub> KO and littermate control mice stained for alveolar progenitor cell markers, pro-SFTPC (red), mature SFTPC (red) and SFTPB (green). Nuclei were visualized with DAPI.

# Supplementary Figure 4

## A

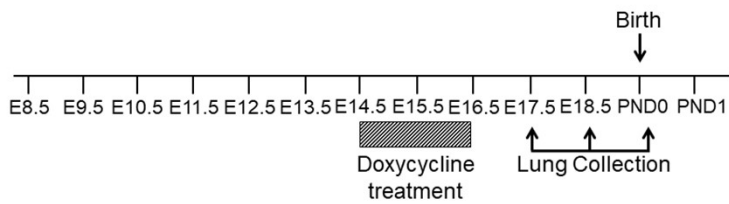

## B

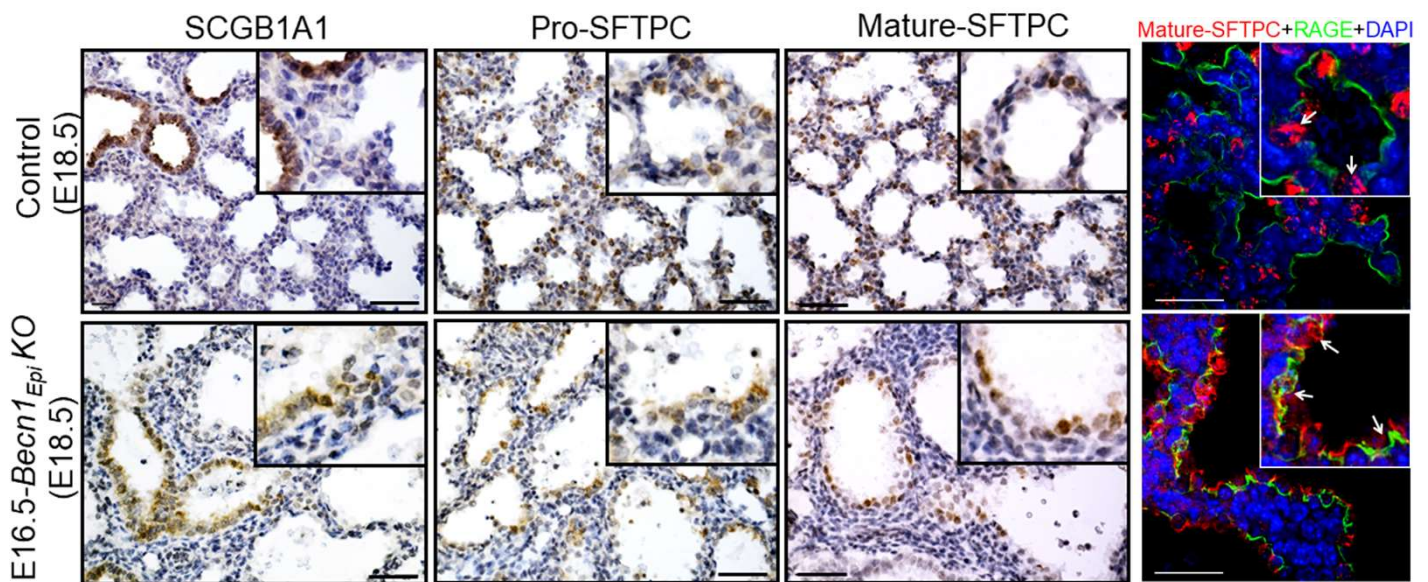

**Supplementary Figure 4: Effect of conditional deletion of lung epithelial *Becn1* at E16.5 of lung development on distal epithelial differentiation.** (A) Experimental protocol for epithelial *Becn1* deletion at canalicular/saccular stages of lung development (E16.5-*Becn1*<sub>Epi</sub> KO). Pregnant mice received doxycycline in drinking water (0.4mg/ml) or food for 48h starting at E14.5. Lungs of the embryos were harvested at different stages of development. (B-left panel) Representative IHC images for Clara cell secretory protein (SCGB1A1), pro- surfactant protein C (Pro-SFTPC) and mature surfactant protein C (SFTPC) in lung tissue sections of E16.5-*Becn1*<sub>Epi</sub> KO and littermate control mice at E18.5. Scale bar: 50 μm. (B-right panel) IF microscopy of E18.5 lung tissue sections from E16.5-*Becn1*<sub>Epi</sub> KO and littermate control fetuses for mature SFTPC (red) and RAGE (green), an alveolar type I marker. Nuclei were visualized with DAPI. Scale bar: 25 μm.

## Supplementary Figure 5

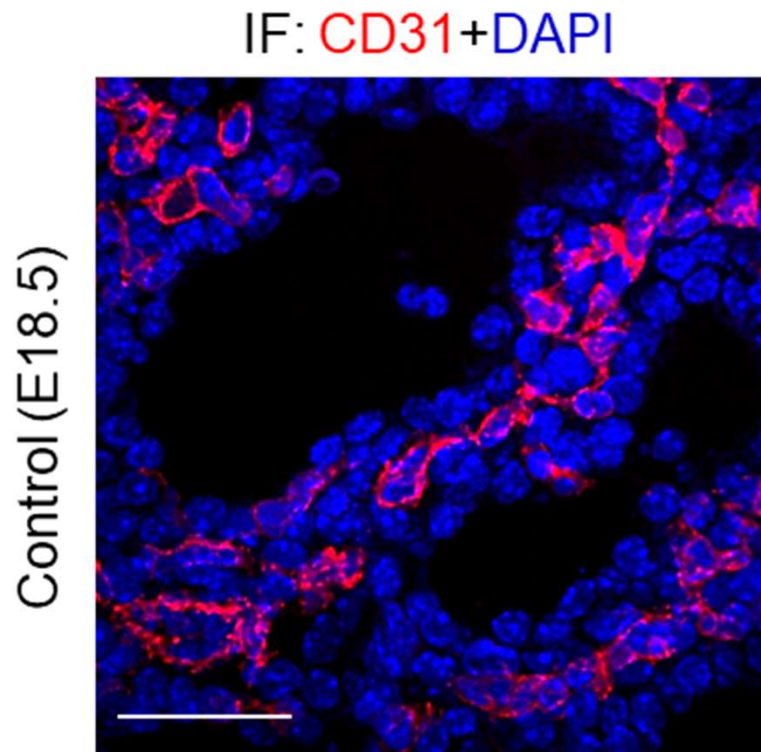

**Supplementary Figure 5: Endothelial cell marker CD31 staining of embryonic lungs (E18.5).**

Confocal IF microscopy of embryonic lungs (E18.5) stained for endothelial cell marker CD31 shows CD31 positivity (red) in a single layer of endothelial cells. Nuclei were visualized with DAPI (blue). Image is captured using 40X objective . Scale bar: 25 um.

## **Autophagy is required for lung development and morphogenesis**

Behzad Yeganeh<sup>1</sup>, Joyce Lee<sup>1,2</sup>, Leonardo Ermini<sup>1</sup>, Irene Lok<sup>1</sup>, Cameron Ackerley<sup>1,3</sup>,  
Martin Post<sup>1,2,3</sup>

<sup>1</sup>Program in Translational Medicine, Peter Gilgan Centre for Research and Learning, Hospital for Sick Children; <sup>2</sup>Institute of Medical Science, <sup>3</sup>Departments of Physiology and Laboratory Medicine and Pathobiology, University of Toronto, Ontario, Canada.

### **Supplemental Material**

**Table 1. List of antibodies and their dilution used in WB and Immuno staining**

| Target                       | Host/<br>Class  | Dilution for |       |       | Catalog<br>#   | Vendor                                                            |
|------------------------------|-----------------|--------------|-------|-------|----------------|-------------------------------------------------------------------|
|                              |                 | WB           | IF    | IHC   |                |                                                                   |
| <b>Primary Antibodies</b>    |                 |              |       |       |                |                                                                   |
| Cleaved caspase-3            | Rabbit          | 1:500        | -     | 1:50  | 9661           | Cell Signaling<br>Technology,<br>(Danvers, MA, USA)               |
| Atg5-12                      | Rabbit          | 1:1000       | -     | -     | 2630           |                                                                   |
| Atg7<br>(D12b11)             | Rabbit/<br>Mono | 1:1000       | -     | -     | 8558           |                                                                   |
| LC3B                         | Rabbit          | 1:1000       | -     | -     | 2775           |                                                                   |
| Beclin-1                     | Rabbit          | 1:1000       | -     | -     | 3738           |                                                                   |
| Vimentin                     | Rabbit/<br>mAB  | -            | 1:100 | -     | 5741           |                                                                   |
| CD31<br>(PECAM-1)            | Rabbit/<br>mAB  | 1:1000       | 1:200 | -     | 77699          |                                                                   |
| AMPK $\beta$ 1/2             | Rabbit/<br>mAB  | 1:1000       | -     | -     | 57C12          |                                                                   |
| P-AMPK $\beta$ 1<br>(Ser182) | Rabbit/<br>mAB  | 1:1000       | -     | -     | 4186           |                                                                   |
| Cleaved PARP (E51)           | Rabbit/<br>mAB  | 1:1000       | 1:200 | 1:200 | ab32064        | Abcam,<br>(Cambridge, MA,<br>USA)                                 |
| TTF1<br>(NKX2.1)             | Rabbit          | 1:1000       | 1:200 | 1:200 | ab76013        |                                                                   |
| Pro-SFTPC                    | Rabbit          | -            | 1:200 | -     | Ab40879        |                                                                   |
| Ki67                         | Rabbit          | -            | -     | 1:50  | Ab833          |                                                                   |
| B-actin                      | Mouse/<br>mAB   | 1:10,000     | -     | -     | A5316          | Sigma-Aldrich,<br>(Oakville, ON,<br>Canada)                       |
| LC3B                         | Rabbit          | 1:3000       | -     | -     | L8918          |                                                                   |
| Mature SP-B                  | Rabbit          | -            | 1:800 | 1:800 | WRAB-<br>48604 | Seven Hills<br>Bioreagents,<br>(Cincinnati, OH, USA)              |
| Mature SP-C                  | Rabbit          | -            | 1:800 | 1:800 | WRAB-<br>76694 |                                                                   |
| LC3B                         | Rabbit          | -            | -     | 1:200 | 18725-1-<br>AP | Proteintech,<br>(Rosemont, IL, USA)                               |
| CDH1                         | Mouse/<br>mAB   | -            | 1:50  | -     | 610181         | BD Biosciences,<br>(Mississauga, ON,<br>Canada)                   |
| Fibronectin                  | Rabbit          | 1:200        | -     | -     | Sc-9068        | Santa Cruz<br>Biotechnology, Inc.<br>(Mississauga, ON,<br>Canada) |
| Bax (B-9)                    | Mouse/<br>mAB   | 1:200        | -     | -     | Sc-7480        |                                                                   |
| CCSP<br>(CC10)               | Rabbit          | -            | -     | 1:200 | Sc-2555        |                                                                   |

### Secondary Antibodies

|                                  |               |         |       |       |             |                                                                           |
|----------------------------------|---------------|---------|-------|-------|-------------|---------------------------------------------------------------------------|
| Rabbit IgG (HRP-linked)          | Goat          | 1:3,000 | -     | -     | 7074        | Cell Signaling Technology,<br>(Danvers, MA, USA)                          |
| Mouse IgG (HRP-linked)           | Horse         | 1:3,000 | -     | -     | 7076        |                                                                           |
| Rabbit IgG (Biotin-SP)           | Goat/<br>Poly | -       | -     | 1:400 | 111-065-003 | Jackson Immuno Research,<br>(West Grove, PA, USA)                         |
| Rabbit IgG (H+L) Alexa Fluor 546 | Goat/<br>Poly | -       | 1:250 |       | A11035      | Invitrogen,<br>(Life Technologies Corporation,<br>Burlington, ON, Canada) |
| Mouse IgG (H+L) Alexa Fluor 488  | Goat/<br>Poly | -       | 1:250 | -     | A11034      |                                                                           |

WB: Western blot, IF: Immunofluorescent staining, IHC: Immunohistochemistry
